# Supplementary material
Source: publisher figshare collection journal article supplement (https://acs.figshare.com/ndownloader/files/3948883)
Supplement: Supplementary file 1 [file 3948883]

# Supporting Information

for

Photophysical Characterization of a Helical Peptide Based Chromophore–Water Oxidation  
Catalyst Assembly on a Semiconductor Surface Using Ultrafast Spectroscopy

Stephanie E. Bettis, Derek M. Ryan, Melissa K. Gish, Leila Alibabaei, Thomas J. Meyer,

Marcey L. Waters, John M. Papanikolas\*

Department of Chemistry, CB 3290, University of North Carolina, Chapel Hill, NC 27599

|                                                                                                                                                  |    |
|--------------------------------------------------------------------------------------------------------------------------------------------------|----|
| 1. Figure S1. Electron Efficiency Calculation.....                                                                                               | S2 |
| 2. Table S1. Summary of the fits for electron injection into TiO <sub>2</sub> .....                                                              | S2 |
| 3. Table S2. Summary of the fits of time-resolved emission.....                                                                                  | S3 |
| 4. Table S3. Summary of the fit of change in red edge of bleach.....                                                                             | S3 |
| 5. Figure S2. Transient absorption spectra and kinetics of ZrO <sub>2</sub> -[Ru <sup>II</sup> -OH <sub>2</sub> ] <sup>2+</sup> .....            | S4 |
| 6. Figure S3. Residuals from the global analysis of TiO <sub>2</sub> -[Ru <sup>II</sup> ] <sup>2+</sup> .....                                    | S5 |
| 7. Figure S4. Residuals from the global analysis of TiO <sub>2</sub> -[Ru <sup>II</sup> -Ru <sup>II</sup> -OH <sub>2</sub> ] <sup>4+</sup> ..... | S5 |

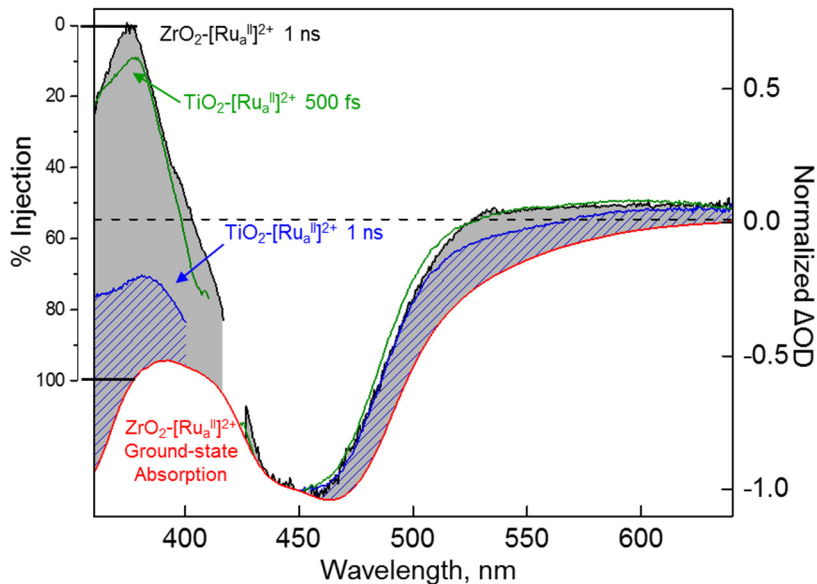

**Figure S1.** The electron injection efficiency for  $\text{TiO}_2\text{-}[\text{Ru}_a^{\text{II}}]^{2+}$  is calculated from the ratio of the difference between the transient absorption intensity at 380 nm of  $[\text{Ru}_a^{\text{II}}]^{2+}$  on  $\text{TiO}_2$  (blue) and  $\text{ZrO}_2$  (black) at 1 ns and the difference between intensity of  $\text{ZrO}_2$  at 1 ns (black) and the inverse of the ground state absorption on  $\text{ZrO}_2$  (red) at 380 nm. The electron injection efficiency for  $\text{TiO}_2\text{-Ru}_a^{\text{II}}$  is 72%. The 9% ultrafast injection is seen in the ratio between  $\text{ZrO}_2\text{-}[\text{Ru}_a^{\text{II}}]^{2+}$  (black) and  $\text{TiO}_2\text{-}[\text{Ru}_a^{\text{II}}]^{2+}$  at 500 fs (green). These efficiencies are used to determine the initial concentrations of  $[-\text{Ru}_a^{\text{II}*}]^{2+}$  and  $[-\text{Ru}_a^{\text{III}}]^{3+}$  in the global analysis.

**Table S1.** Summary of fit for electron injection kinetics at 380 nm of  $[\text{Ru}_a^{\text{II}}]^{2+}$ ,  $[\text{Ru}_a^{\text{II}}\text{-Ru}_b^{\text{II}}\text{-OH}_2]^{4+}$ , and  $[\text{Ru}^{\text{II}}(\text{pbpy})_2(\text{bpy})]^{2+}$  on  $\text{TiO}_2$  and  $\text{ZrO}_2$ .

|                                                                                          | $A_1$           | $\tau_1$         | $A_2$           | $\tau_2$         | Offset           |
|------------------------------------------------------------------------------------------|-----------------|------------------|-----------------|------------------|------------------|
| $\text{TiO}_2\text{-}[\text{Ru}_a^{\text{II}}]^{2+}$                                     | $0.59 \pm 0.31$ | $19.3 \pm 1.5$   | $0.69 \pm 0.03$ | $201.7 \pm 18.5$ | $-0.34 \pm 0.14$ |
| $\text{ZrO}_2\text{-}[\text{Ru}_a^{\text{II}}]^{2+}$                                     | $0.03 \pm 0.02$ | $9.7 \pm 17.6$   | --              | --               | $0.87 \pm 0.12$  |
| $\text{TiO}_2\text{-}[\text{Ru}^{\text{II}}(\text{pbpy})_2(\text{bpy})]^{2+}$            | $0.71 \pm 0.20$ | $14.3 \pm 4.3$   | $0.46 \pm 0.20$ | $77.5 \pm 36.1$  | $-0.33 \pm .02$  |
| $\text{TiO}_2\text{-}[\text{Ru}_a^{\text{II}}\text{-Ru}_b^{\text{II}}\text{-OH}_2]^{4+}$ | $0.57 \pm 0.02$ | $6.85 \pm 0.55$  | $0.53 \pm 0.02$ | $77.10 \pm 6.44$ | $-0.11 \pm 0.07$ |
| $\text{ZrO}_2\text{-}[\text{Ru}_a^{\text{II}}\text{-Ru}_b^{\text{II}}\text{-OH}_2]^{4+}$ | $0.33 \pm 0.02$ | $101.3 \pm 23.7$ | --              | --               | $0.55 \pm 0.02$  |

**Table S2. Summary of the fits of time-resolved emission for  $\text{ZrO}_2\text{-[Ru}_a^{\text{II}}\text{]}^{2+}$  and  $\text{ZrO}_2\text{-[Ru}_a^{\text{II}}\text{-Ru}_b^{\text{II}}\text{-OH}_2\text{]}^{4+}$ .**

|                                                                                          | $A_1$           | $k_1, \times 10^6 \text{ s}^{-1}$<br>( $\tau_1, \text{ns}$ ) | $A_2$           | $k_1, \times 10^6 \text{ s}^{-1}$<br>( $\tau_2, \text{ns}$ ) | Average $k_1,$<br>$\times 10^6 \text{ s}^{-1}$ ( $\tau, \text{ns}$ ) |
|------------------------------------------------------------------------------------------|-----------------|--------------------------------------------------------------|-----------------|--------------------------------------------------------------|----------------------------------------------------------------------|
| $\text{ZrO}_2\text{-[Ru}_a^{\text{II}}\text{]}^{2+}$                                     | $0.4 \pm 0.01$  | $14.2 \pm 0.2$<br>( $70.4 \pm 1.0$ )                         | $0.6 \pm 0.01$  | $2.57 \pm 0.01$<br>( $389 \pm 1.4$ )                         | $3.82 \pm 0.02$<br>( $261.5 \pm 1.2$ )                               |
| $\text{ZrO}_2\text{-[Ru}_a^{\text{II}}\text{-Ru}_b^{\text{II}}\text{-OH}_2\text{]}^{4+}$ | $0.87 \pm 0.01$ | $73.6 \pm 1.1$<br>( $13.6 \pm 0.2$ )                         | $0.13 \pm 0.01$ | $14.3 \pm 0.4$<br>( $70.0 \pm 2.1$ )                         | $47.8 \pm 0.9$<br>( $20.9 \pm 0.4$ )                                 |

**Table S3. Summary of the fit to the change in wavelength of the bleach (at 50% point) for  $\text{TiO}_2\text{-[Ru}_a^{\text{II}}\text{]}^{2+}$  and  $\text{TiO}_2\text{-[Ru}_a^{\text{II}}\text{-Ru}_b^{\text{II}}\text{-OH}_2\text{]}^{4+}$ .**

|                                                                | $A_1$          | $\tau_1$ (ps)     | $A_2$          | $\tau_2$ (ps)      |
|----------------------------------------------------------------|----------------|-------------------|----------------|--------------------|
| $\text{TiO}_2\text{-[Ru}_a^{\text{II}}\text{]}^{2+}$           | $1 \pm 0.05$   | $80.84 \pm 12.34$ | --             | --                 |
| $\text{TiO}_2\text{-Ru}_a^{\text{II}}\text{-Ru}_b^{\text{II}}$ | $0.3 \pm 0.03$ | $25.51 \pm 3.89$  | $0.7 \pm 0.03$ | $342.91 \pm 48.52$ |

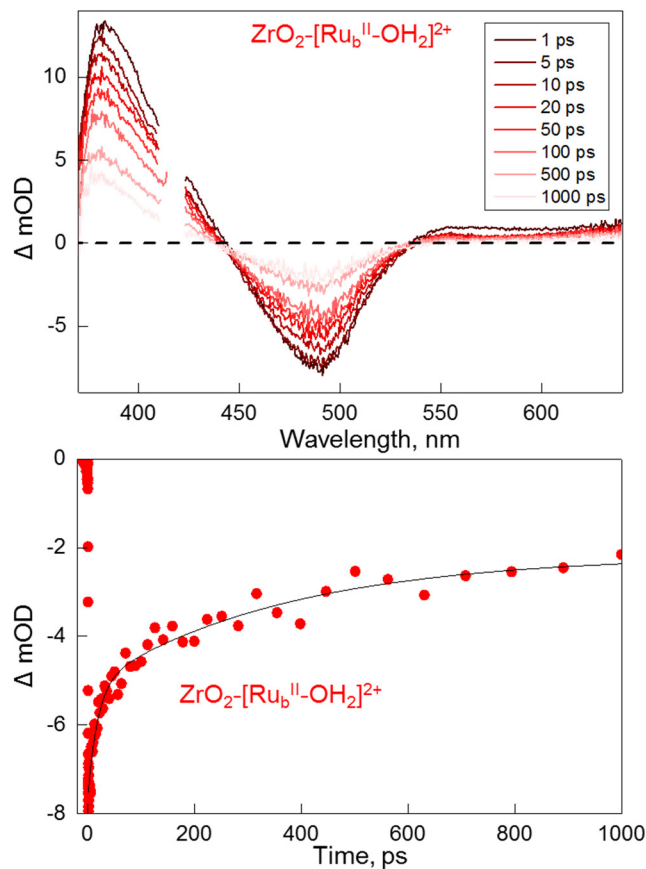

**Figure S2.** a) Transient absorption spectra of  $ZrO_2-[Ru(4,4'-(CH_2PO_3H_2)_2bpy)(mebimpy)(H_2O)]^{2+}$  from 1 ps (dark line) to 1 ns (light line) after laser excitation. b) Transient absorption kinetics of  $ZrO_2-[Ru(4,4'-(CH_2PO_3H_2)_2bpy)(mebimpy)(H_2O)]^{2+}$  at 490 nm. The biexponential fit (black line) has an offset of -2.2 and two time components  $5.45 \times 10^{10} s^{-1}$ , 18.3 ps (-2.4) and  $2.75 \times 10^9 s^{-1}$ , 363.6 ps (-3.0). The fast component is due to vibrational relaxation on  $ZrO_2$  surface and the long component is the catalyst excited-state decay. The sample was on 3  $\mu m$  thick nanocrystalline  $ZrO_2$  in aqueous 0.1 M  $HClO_4$  at 25  $^{\circ}C$ . The excitation wavelength was 420 nm.

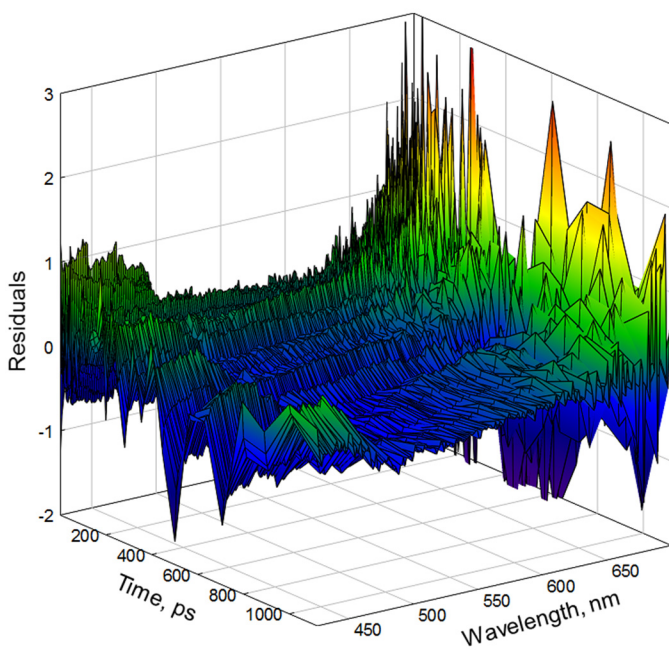

**Figure S3.** Residuals from the global analysis of  $\text{TiO}_2\text{-}[\text{Ru}_a^{\text{II}}]^{2+}$ .

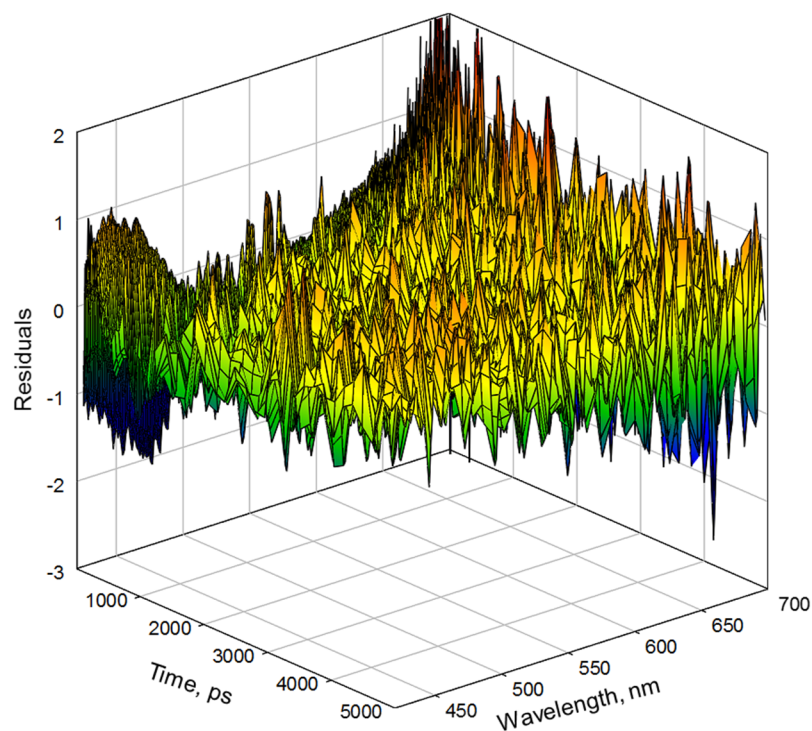

**Figure S4.** Residuals from the global analysis of  $\text{TiO}_2\text{-}[\text{Ru}_a^{\text{II}}\text{-Ru}_b^{\text{II}}\text{-OH}_2]^{4+}$ .
